# Supplementary material for: Effect of exercise training on heart rate variability in type 2 diabetes mellitus patients: A systematic review and meta-analysis
Source: PubMed Central journal article supplement (PMC8128270; doi:10.1371/journal.pone.0251863), 2021-05-17

# SDNN in T2D after exercise compared to baseline and in controls without exercise

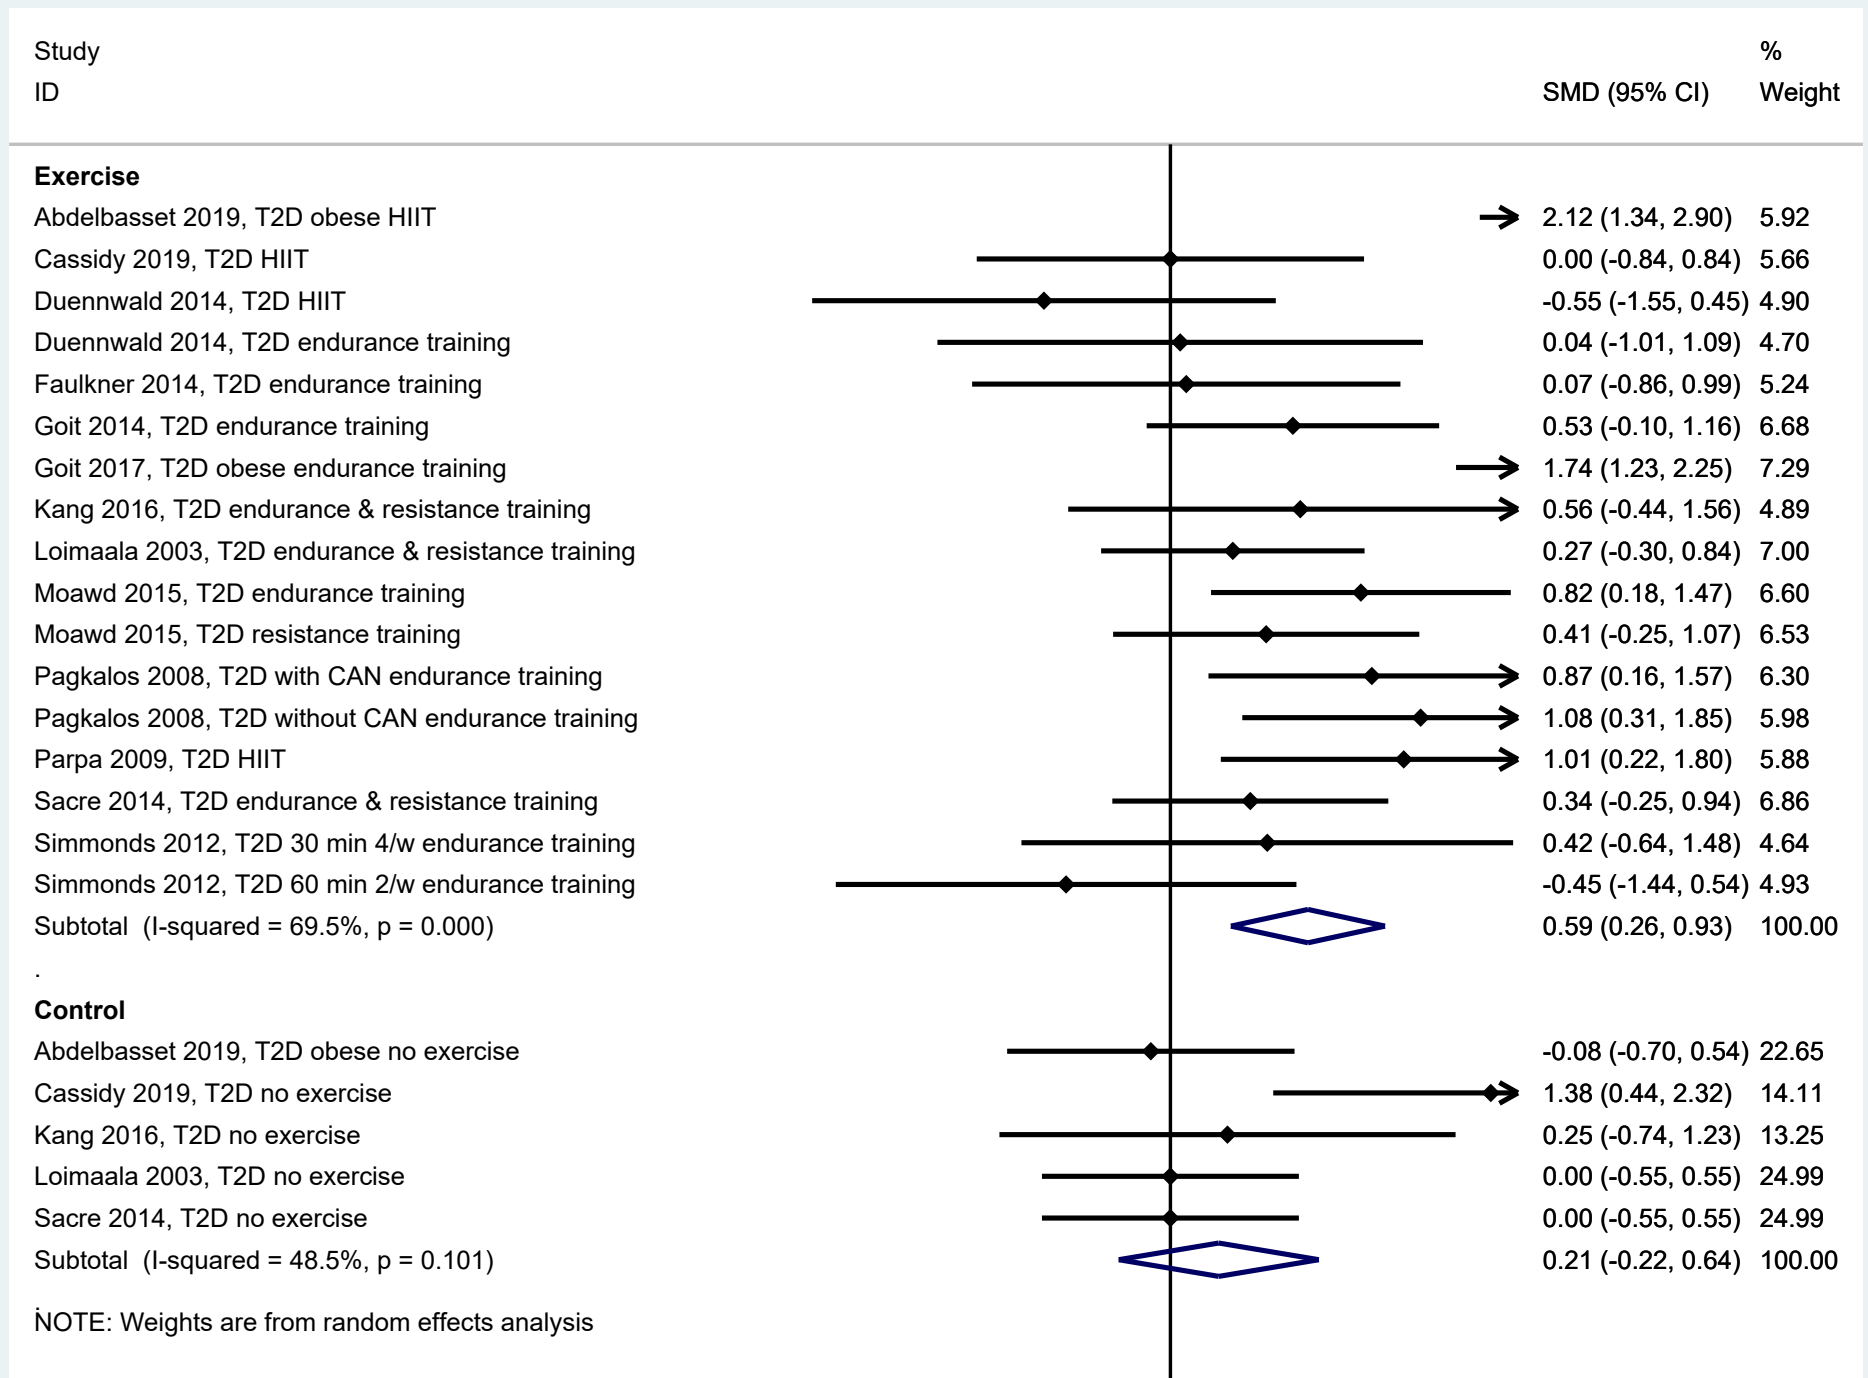

Supplement: pone.0251863.s007.pdf [file pone.0251863.s007.pdf]
